# Supplementary material for: Mesenchymal stem cells for sensorineural hearing loss: protocol for a systematic review of preclinical studies
Source: Springer Nature journal article supplement (doi:10.1186/s13643-019-1015-7), 2019-05-25
Supplement: MOESM1 [file 16750960]

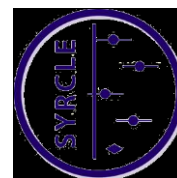

## SYSTEMATIC REVIEW PROTOCOL FOR ANIMAL INTERVENTION STUDIES

FORMAT BY SYRCLE ([WWW.SYRCLE.NL](http://www.syrcle.nl))

VERSION 2.0 (DECEMBER 2014)

| Item #               | Section/Subsection/Item                                                                             | Description                                                                                                                                                                                                                                                                                                                                                                                                                                                                            | Check for approval |
|----------------------|-----------------------------------------------------------------------------------------------------|----------------------------------------------------------------------------------------------------------------------------------------------------------------------------------------------------------------------------------------------------------------------------------------------------------------------------------------------------------------------------------------------------------------------------------------------------------------------------------------|--------------------|
| <b>A. General</b>    |                                                                                                     |                                                                                                                                                                                                                                                                                                                                                                                                                                                                                        |                    |
| 1.                   | Title of the review                                                                                 | Mesenchymal stem cells for sensorineural hearing loss: a systematic review of pre-clinical studies                                                                                                                                                                                                                                                                                                                                                                                     |                    |
| 2.                   | Authors (names, affiliations, contributions)                                                        | Kevin Chorath: study design, data collection and analysis, manuscript writing<br>Nicolas Morton-Gonzaba: data collection and analysis, manuscript writing<br>Walter John Humann: study design<br>Matthew Willis: study design, data collection and analysis, manuscript writing<br>Alvaro Moreira: study design, statistical analysis, manuscript revising, supervision<br><br>University of Texas Health San Antonio<br>7703 Floyd Curl Dr., MC 7812<br>San Antonio, Texas, 78229 USA |                    |
| 3.                   | Other contributors (names, affiliations, contributions)                                             |                                                                                                                                                                                                                                                                                                                                                                                                                                                                                        |                    |
| 4.                   | Contact person + e-mail address                                                                     | Alvaro Moreira: <a href="mailto:moreiraa@uthscsa.edu">moreiraa@uthscsa.edu</a>                                                                                                                                                                                                                                                                                                                                                                                                         |                    |
| 5.                   | Funding sources/sponsors                                                                            | National Center for Advancing Translational Sciences, National Institutes of Health, through Grant KL2 TR001118.                                                                                                                                                                                                                                                                                                                                                                       |                    |
| 6.                   | Conflicts of interest                                                                               | None                                                                                                                                                                                                                                                                                                                                                                                                                                                                                   |                    |
| 7.                   | Date and location of protocol registration                                                          |                                                                                                                                                                                                                                                                                                                                                                                                                                                                                        |                    |
| 8.                   | Registration number (if applicable)                                                                 |                                                                                                                                                                                                                                                                                                                                                                                                                                                                                        |                    |
| 9.                   | Stage of review at time of registration                                                             | Preliminary searches<br>Piloting study selection<br>Formal screening with final search criteria                                                                                                                                                                                                                                                                                                                                                                                        |                    |
| <b>B. Objectives</b> |                                                                                                     |                                                                                                                                                                                                                                                                                                                                                                                                                                                                                        |                    |
| <b>Background</b>    |                                                                                                     |                                                                                                                                                                                                                                                                                                                                                                                                                                                                                        |                    |
| 10.                  | What is already known about this disease/model/intervention? Why is it important to do this review? | Sensorineural hearing loss (SNHL) is the most common form of permanent hearing loss. Unfortunately, there is no proven therapy to cure SNHL. However, advances in regenerative medicine have shown mesenchymal stem cells are a novel therapy in improving hearing in animal models of SNHL. Despite promising findings, a methodical evaluation of preclinical studies has not been performed.                                                                                        |                    |

|                                 |                                                                                                                                                        |                                                                                                                                                                                                                                                                                                                                                                                                                |  |
|---------------------------------|--------------------------------------------------------------------------------------------------------------------------------------------------------|----------------------------------------------------------------------------------------------------------------------------------------------------------------------------------------------------------------------------------------------------------------------------------------------------------------------------------------------------------------------------------------------------------------|--|
|                                 |                                                                                                                                                        | The purpose of this systematic review is to examine the potential use mesenchymal stem cells (MSC) as a therapy in animal models of SNHL.                                                                                                                                                                                                                                                                      |  |
| Research question               |                                                                                                                                                        |                                                                                                                                                                                                                                                                                                                                                                                                                |  |
| 11.                             | Specify the disease/health problem of interest                                                                                                         | <u>Sensorineural hearing loss</u> : congenital, age related, or induced                                                                                                                                                                                                                                                                                                                                        |  |
| 12.                             | Specify the population/species studied                                                                                                                 | All animal species, all ages                                                                                                                                                                                                                                                                                                                                                                                   |  |
| 13.                             | Specify the intervention/exposure                                                                                                                      | Mesenchymal stem/stromal cells                                                                                                                                                                                                                                                                                                                                                                                 |  |
| 14.                             | Specify the control population                                                                                                                         | Sensorineural hearing loss with severity equivalent to experimental group, not receiving stem cell therapy                                                                                                                                                                                                                                                                                                     |  |
| 15.                             | Specify the outcome measures                                                                                                                           | <u>Primary outcome</u> : Functional hearing assessment<br>Otoacoustic emissions (OAE)<br>Cochlear microphonic<br>Auditory brainstem response (ABR)<br>Electrocochleography<br>Summating potential<br>Tympanometry<br>Compound action potential<br>Brainstem auditory evoked potentials (BAEP)<br><br><u>Secondary outcome</u> :<br>Imaging<br>Histology<br>Microscopy<br>Gene protein expression<br>Behavioral |  |
| 16.                             | State your research question (based on items 11-15)                                                                                                    | Can MSCs improve sensorineural hearing loss in animals?                                                                                                                                                                                                                                                                                                                                                        |  |
| C. Methods                      |                                                                                                                                                        |                                                                                                                                                                                                                                                                                                                                                                                                                |  |
| Search and study identification |                                                                                                                                                        |                                                                                                                                                                                                                                                                                                                                                                                                                |  |
| 17.                             | Identify literature databases to search (e.g. Pubmed, Embase, Web of science)                                                                          | X MEDLINE via PubMed <input type="checkbox"/> Web of Science<br>X SCOPUS <input type="checkbox"/> EMBASE<br>X Other, namely: Science Direct, CINAHL, Google Scholar<br><input type="checkbox"/> Specific journal(s), namely:                                                                                                                                                                                   |  |
| 18.                             | Define electronic search strategies (e.g. use the <a href="#">step by step search guide<sup>15</sup></a> and animal search filters <sup>20, 21</sup> ) | When available, please add a supplementary file containing your search strategy: [insert file name]                                                                                                                                                                                                                                                                                                            |  |
| 19.                             | Identify other sources for study identification                                                                                                        | X Reference lists of included studies <input type="checkbox"/> Books<br>X Reference lists of relevant reviews<br><input type="checkbox"/> Conference proceedings, namely:<br><input type="checkbox"/> Contacting authors/ organisations, namely:<br><input type="checkbox"/> Other, namely:                                                                                                                    |  |
| 20.                             | Define search strategy for these other sources                                                                                                         | Screening the reference lists for relevant titles and screening the abstracts of these relevant titles                                                                                                                                                                                                                                                                                                         |  |
| Study selection                 |                                                                                                                                                        |                                                                                                                                                                                                                                                                                                                                                                                                                |  |

|                                                                                                |                                                                                                         |                                                                                                                                                                                                                                                                                                     |  |
|------------------------------------------------------------------------------------------------|---------------------------------------------------------------------------------------------------------|-----------------------------------------------------------------------------------------------------------------------------------------------------------------------------------------------------------------------------------------------------------------------------------------------------|--|
| 21.                                                                                            | Define screening phases ( <i>e.g.</i> pre-screening based on title/abstract, full text screening, both) | First phase screening based on title and abstract<br>Second phase full-text screening of the eligible articles                                                                                                                                                                                      |  |
| 22.                                                                                            | Specify (a) the number of reviewers per screening phase and (b) how discrepancies will be resolved      | Two investigators (K. Chorath and M. Willis) will independently screen all the abstracts/full texts for the inclusion criteria. Differences of opinion in either phase that cannot be resolved by discussion will be resolved by consulting a third investigator (A. Moreira).                      |  |
| <i>Define all inclusion and exclusion criteria based on:</i>                                   |                                                                                                         |                                                                                                                                                                                                                                                                                                     |  |
| 23.                                                                                            | Type of study (design)                                                                                  | <u>Inclusion criteria:</u><br>Animal intervention studies, regardless of the methodological quality<br><br><u>Exclusion criteria:</u><br>Non-intervention studies<br>No control group                                                                                                               |  |
| 24.                                                                                            | Type of animals/population ( <i>e.g.</i> age, gender, disease model)                                    | <u>Inclusion criteria:</u><br>All genders<br>All ages<br><br><u>Exclusion criteria:</u><br>Humans<br><i>In vitro</i>                                                                                                                                                                                |  |
| 25.                                                                                            | Type of intervention ( <i>e.g.</i> dosage, timing, frequency)                                           |                                                                                                                                                                                                                                                                                                     |  |
| 26.                                                                                            | Outcome measures                                                                                        | <u>Primary outcome:</u> Functional hearing assessment<br><br><u>Secondary outcome:</u> Refer to objective 15                                                                                                                                                                                        |  |
| 27.                                                                                            | Language restrictions                                                                                   | Only English articles will be included                                                                                                                                                                                                                                                              |  |
| 28.                                                                                            | Publication date restrictions                                                                           | None                                                                                                                                                                                                                                                                                                |  |
| 29.                                                                                            | Other                                                                                                   |                                                                                                                                                                                                                                                                                                     |  |
| 30.                                                                                            | Sort and prioritize your exclusion criteria per selection phase                                         | <u>Selection phase I:</u><br>1. Not a primary study<br>2. Not an <i>in vivo</i> animal study<br>3. Not SNHL<br>4. No MSC treatment<br><br><u>Selection phase II:</u><br>1. Not a primary study<br>2. Not an <i>in vivo</i> animal study<br>3. No SNHL<br>4. No MSC treatment<br>5. No control group |  |
| Study characteristics to be extracted (for assessment of external validity, reporting quality) |                                                                                                         |                                                                                                                                                                                                                                                                                                     |  |
| 31.                                                                                            | Study ID ( <i>e.g.</i> authors, year)                                                                   | Authors, journal, title, year, language, contact author e-                                                                                                                                                                                                                                          |  |

|                                                                                        |                                                                                                                                                                                                             |                                                                                                                                                                                                                                                                                                                                                                                                                        |  |
|----------------------------------------------------------------------------------------|-------------------------------------------------------------------------------------------------------------------------------------------------------------------------------------------------------------|------------------------------------------------------------------------------------------------------------------------------------------------------------------------------------------------------------------------------------------------------------------------------------------------------------------------------------------------------------------------------------------------------------------------|--|
|                                                                                        |                                                                                                                                                                                                             | mail                                                                                                                                                                                                                                                                                                                                                                                                                   |  |
| 32.                                                                                    | Study design characteristics (e.g. experimental groups, number of animals)                                                                                                                                  | Number of animals in experimental and control groups<br>Etiology for SNHL                                                                                                                                                                                                                                                                                                                                              |  |
| 33.                                                                                    | Animal model characteristics (e.g. species, gender, disease induction)                                                                                                                                      | Animal species, strain, age, gender, congenital, disease induction, immune status                                                                                                                                                                                                                                                                                                                                      |  |
| 34.                                                                                    | Intervention characteristics (e.g. intervention, timing, duration)                                                                                                                                          | Source, dose, route of delivery, timing, and frequency of MSCs                                                                                                                                                                                                                                                                                                                                                         |  |
| 35.                                                                                    | Outcome measures                                                                                                                                                                                            | Type and timing of outcome measures in paper                                                                                                                                                                                                                                                                                                                                                                           |  |
| 36.                                                                                    | Other (e.g. drop-outs)                                                                                                                                                                                      | Reason of exclusion                                                                                                                                                                                                                                                                                                                                                                                                    |  |
| Assessment risk of bias (internal validity) or study quality                           |                                                                                                                                                                                                             |                                                                                                                                                                                                                                                                                                                                                                                                                        |  |
| 37.                                                                                    | Specify (a) the number of reviewers assessing the risk of bias/study quality in each study and (b) how discrepancies will be resolved                                                                       | Two investigators (K. Chorath and M. Willis) will independently screen all the abstracts/full texts for the inclusion criteria. Differences of opinion in either phase that cannot be resolved by discussion will be resolved by consulting a third investigator (A. Moreira).                                                                                                                                         |  |
| 38.                                                                                    | Define criteria to assess (a) the internal validity of included studies (e.g. selection, performance, detection and attrition bias) and/or (b) other study quality measures (e.g. reporting quality, power) | X By use of <a href="#">SYRCLE's Risk of Bias tool<sup>4</sup></a><br><input type="checkbox"/> By use of SYRCLE's Risk of Bias tool, adapted as follows:<br><input type="checkbox"/> By use of <a href="#">CAMARADES' study quality checklist, e.g.<sup>22</sup></a><br><input type="checkbox"/> By use of CAMARADES' study quality checklist, adapted as follows:<br><input type="checkbox"/> Other criteria, namely: |  |
| Collection of outcome data                                                             |                                                                                                                                                                                                             |                                                                                                                                                                                                                                                                                                                                                                                                                        |  |
| 39.                                                                                    | For each outcome measure, define the type of data to be extracted (e.g. continuous/dichotomous, unit of measurement)                                                                                        | <u>Primary/Secondary outcome:</u> continuous data                                                                                                                                                                                                                                                                                                                                                                      |  |
| 40.                                                                                    | Methods for data extraction/retrieval (e.g. first extraction from graphs using a digital screen ruler, then contacting authors)                                                                             | Extraction from text, tables, and figures (GetData Graph Digitizer)                                                                                                                                                                                                                                                                                                                                                    |  |
| 41.                                                                                    | Specify (a) the number of reviewers extracting data and (b) how discrepancies will be resolved                                                                                                              | Two investigators (K. Chorath and M. Willis) will independently screen all the abstracts/full texts for the inclusion criteria. Differences of opinion in either phase that cannot be resolved by discussion will be resolved by consulting a third investigator (A. Moreira).                                                                                                                                         |  |
| Data analysis/synthesis                                                                |                                                                                                                                                                                                             |                                                                                                                                                                                                                                                                                                                                                                                                                        |  |
| 42.                                                                                    | Specify (per outcome measure) how you are planning to combine/compare the data (e.g. descriptive summary, meta-analysis)                                                                                    |                                                                                                                                                                                                                                                                                                                                                                                                                        |  |
| 43.                                                                                    | Specify (per outcome measure) how it will be decided whether a meta-analysis will be performed                                                                                                              |                                                                                                                                                                                                                                                                                                                                                                                                                        |  |
| <i>If a meta-analysis seems feasible/sensible, specify (for each outcome measure):</i> |                                                                                                                                                                                                             |                                                                                                                                                                                                                                                                                                                                                                                                                        |  |
| 44.                                                                                    | The effect measure to be used (e.g. mean difference, standardized mean difference, risk ratio, odds ratio)                                                                                                  | Continuous outcomes will be analysed using standardized mean differences (95% CI)                                                                                                                                                                                                                                                                                                                                      |  |

|     |                                                                                                                          |                                                                                                                                                                                                                                                                                                         |  |
|-----|--------------------------------------------------------------------------------------------------------------------------|---------------------------------------------------------------------------------------------------------------------------------------------------------------------------------------------------------------------------------------------------------------------------------------------------------|--|
| 45. | The statistical model of analysis ( <i>e.g.</i> random or fixed effects model)                                           | Random-effects model                                                                                                                                                                                                                                                                                    |  |
| 46. | The statistical methods to assess heterogeneity ( <i>e.g.</i> $I^2$ , Q)                                                 | $I^2$                                                                                                                                                                                                                                                                                                   |  |
| 47. | Which study characteristics will be examined as potential source of heterogeneity (subgroup analysis)                    | Meta-regression analyses will be performed to examine heterogeneity on outcomes including: animal type, animal age, sex, species and strain, type of SNHL induction, type and tissue source of MSCs, timing, frequency, dosing of administration, route of cell administration, use of co-interventions |  |
| 48. | Any sensitivity analyses you propose to perform                                                                          |                                                                                                                                                                                                                                                                                                         |  |
| 49. | Other details meta-analysis ( <i>e.g.</i> correction for multiple testing, correction for multiple use of control group) |                                                                                                                                                                                                                                                                                                         |  |
| 50. | The method for assessment of publication bias                                                                            | Funnel plots and Egger's test                                                                                                                                                                                                                                                                           |  |

Final approval by (names, affiliations):  
Kevin Chorath, Nicolas Morton-Gonzaba,  
Matthew Willis, Alvaro Moreira

Date: June 13, 2018
